# Supplementary material for: Ptk7 Marks the First Human Developmental EMT In Vitro
Source: PubMed Central journal article supplement (PMC3508926; doi:10.1371/journal.pone.0050432), 2012-11-28
Supplement: pone.0050432.s005.pdf [file pone.0050432.s005.pdf]

| <b>hEB<br/>population</b> | <b>% Ki67<br/>positive</b> | <b>% Caspase3<br/>positive</b> |
|---------------------------|----------------------------|--------------------------------|
| PTK7+                     | 76.1% ± 2.8%               | 3.1% ± 1.6%                    |
| PTK7-                     | 69.3% ± 4.9%               | 15.8% ± 2.5%                   |
