# Supplementary material for: Ptk7 Marks the First Human Developmental EMT In Vitro
Source: PubMed Central journal article supplement (PMC3508926; doi:10.1371/journal.pone.0050432), 2012-11-28

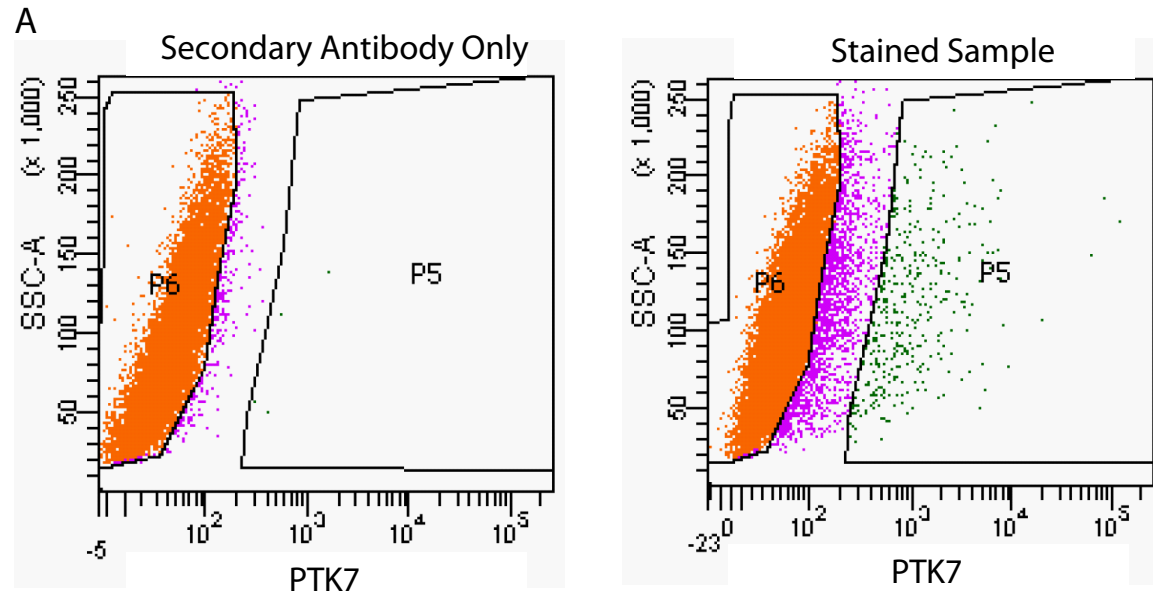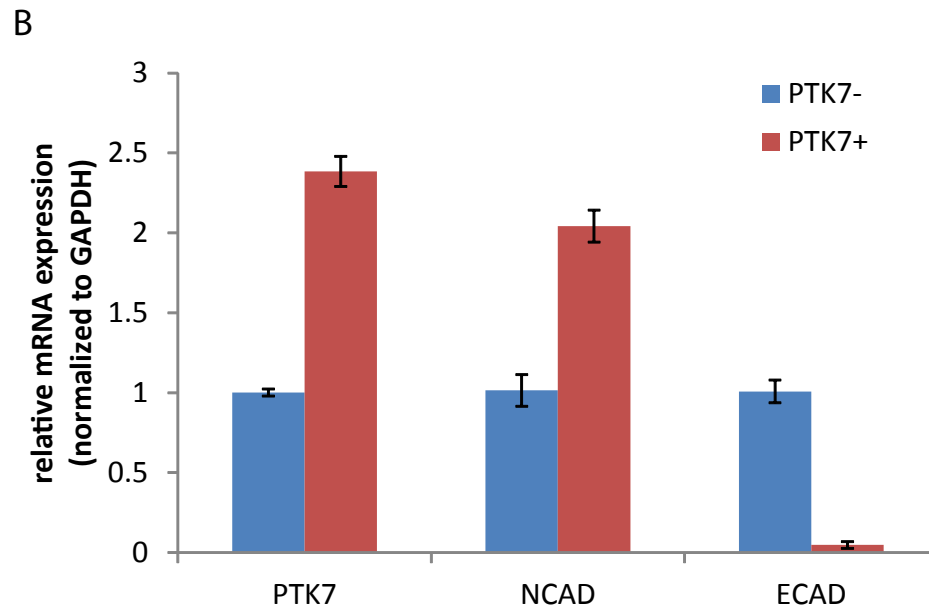

Supplement: pone.0050432.s006.pdf [file pone.0050432.s006.pdf]
